# Supplementary material for: Modeling Brain Functional Connectivity Patterns during an Isometric Arm Force Exertion Task at Different Levels of Perceived Exertion: A Graph Theoretical Approach
Source: MDPI journal article supplement (doi:10.3390/brainsci12111575), 2022-11-18
Supplement: s1 [file s1]

### Supplementary Material A

Montreal Neurophysiological Institute (MNI) coordinates of the 84 regions of interest (ROI) used to analyze the electroencephalograph signal of each exertion level.

| Hemisphere | MNI |     |     | Lobe          | Structure              | Brodmann area | ROI |
|------------|-----|-----|-----|---------------|------------------------|---------------|-----|
|            | X   | Y   | Z   |               |                        |               |     |
| Left       | -35 | -25 | 55  | Frontal Lobe  | Precentral Gyrus       | BA 4          | 1   |
| Right      | 35  | -20 | 50  | Frontal Lobe  | Precentral Gyrus       | BA 4          | 2   |
| Right      | 15  | -45 | 60  | Frontal Lobe  | Paracentral Lobule     | BA 5          | 3   |
| Left       | -15 | -45 | 60  | Frontal Lobe  | Paracentral Lobule     | BA 5          | 4   |
| Right      | 30  | -5  | 55  | Frontal Lobe  | Middle Frontal Gyrus   | BA 6          | 5   |
| Left       | -30 | -5  | 55  | Frontal Lobe  | Middle Frontal Gyrus   | BA 6          | 6   |
| Right      | 20  | 25  | 50  | Frontal Lobe  | Superior Frontal Gyrus | BA 8          | 7   |
| Left       | -20 | 30  | 50  | Frontal Lobe  | Superior Frontal Gyrus | BA 8          | 8   |
| Left       | -30 | 30  | 35  | Frontal Lobe  | Middle Frontal Gyrus   | BA 9          | 9   |
| Right      | 30  | 30  | 35  | Frontal Lobe  | Middle Frontal Gyrus   | BA 9          | 10  |
| Right      | 25  | 55  | 5   | Frontal Lobe  | Superior Frontal Gyrus | BA 10         | 11  |
| Left       | -25 | 55  | 5   | Frontal Lobe  | Superior Frontal Gyrus | BA 10         | 12  |
| Right      | 20  | 45  | -20 | Frontal Lobe  | Superior Frontal Gyrus | BA 11         | 13  |
| Left       | -20 | 40  | -15 | Frontal Lobe  | Middle Frontal Gyrus   | BA 11         | 14  |
| Right      | 5   | 15  | -15 | Frontal Lobe  | Subcallosal Gyrus      | BA 25         | 15  |
| Left       | -10 | 20  | -15 | Frontal Lobe  | Medial Frontal Gyrus   | BA 25         | 16  |
| Right      | 55  | 10  | 15  | Frontal Lobe  | Precentral Gyrus       | BA 44         | 17  |
| Left       | -50 | 10  | 15  | Frontal Lobe  | Precentral Gyrus       | BA 44         | 18  |
| Right      | 50  | 20  | 15  | Frontal Lobe  | Inferior Frontal Gyrus | BA 45         | 19  |
| Left       | -50 | 20  | 15  | Frontal Lobe  | Inferior Frontal Gyrus | BA 45         | 20  |
| Right      | 45  | 35  | 20  | Frontal Lobe  | Middle Frontal Gyrus   | BA 46         | 21  |
| Left       | -45 | 35  | 20  | Frontal Lobe  | Middle Frontal Gyrus   | BA 46         | 22  |
| Right      | 30  | 25  | -15 | Frontal Lobe  | Inferior Frontal Gyrus | BA 47         | 23  |
| Left       | -30 | 25  | -15 | Frontal Lobe  | Inferior Frontal Gyrus | BA 47         | 24  |
| Left       | -55 | -25 | 50  | Parietal Lobe | Postcentral Gyrus      | BA 2          | 25  |
| Left       | -45 | -30 | 45  | Parietal Lobe | Postcentral Gyrus      | BA 2          | 26  |
| Right      | 55  | -25 | 50  | Parietal Lobe | Postcentral Gyrus      | BA 2          | 27  |
| Right      | 35  | -25 | 50  | Parietal Lobe | Postcentral Gyrus      | BA 3          | 28  |
| Right      | 40  | -25 | 50  | Parietal Lobe | Postcentral Gyrus      | BA 3          | 29  |
| Left       | -20 | -65 | 50  | Parietal Lobe | Precuneus              | BA 7          | 30  |
| Right      | 15  | -65 | 50  | Parietal Lobe | Precuneus              | BA 7          | 31  |
| Left       | -10 | -50 | 30  | Parietal Lobe | Precuneus              | BA 31         | 32  |
| Right      | 10  | -50 | 35  | Parietal Lobe | Precuneus              | BA 31         | 33  |

|       |     |     |     |               |                          |       |    |
|-------|-----|-----|-----|---------------|--------------------------|-------|----|
| Right | 50  | -30 | 45  | Parietal Lobe | Inferior Parietal Lobule | BA 40 | 34 |
| Right | 50  | -45 | 45  | Parietal Lobe | Inferior Parietal Lobule | BA 40 | 35 |
| Left  | -50 | -40 | 40  | Parietal Lobe | Inferior Parietal Lobule | BA 40 | 36 |
| Left  | -5  | -40 | 25  | Limbic Lobe   | Posterior Cingulate      | BA 23 | 37 |
| Right | 5   | -45 | 25  | Limbic Lobe   | Posterior Cingulate      | BA 23 | 38 |
| Right | 5   | 0   | 35  | Limbic Lobe   | Cingulate Gyrus          | BA 24 | 39 |
| Right | 5   | 30  | 20  | Limbic Lobe   | Anterior Cingulate       | BA 24 | 40 |
| Left  | -5  | 0   | 35  | Limbic Lobe   | Cingulate Gyrus          | BA 24 | 41 |
| Left  | -5  | 30  | 20  | Limbic Lobe   | Anterior Cingulate       | BA 24 | 42 |
| Right | 20  | -35 | -5  | Limbic Lobe   | Parahippocampal Gyrus    | BA 27 | 43 |
| Left  | -20 | -35 | -5  | Limbic Lobe   | Parahippocampal Gyrus    | BA 27 | 44 |
| Left  | -20 | -10 | -25 | Limbic Lobe   | Parahippocampal Gyrus    | BA 28 | 45 |
| Right | 20  | -10 | -25 | Limbic Lobe   | Parahippocampal Gyrus    | BA 28 | 46 |
| Left  | -5  | -50 | 5   | Limbic Lobe   | Posterior Cingulate      | BA 29 | 47 |
| Right | 5   | -50 | 5   | Limbic Lobe   | Posterior Cingulate      | BA 29 | 48 |
| Left  | -15 | -60 | 5   | Limbic Lobe   | Posterior Cingulate      | BA 30 | 49 |
| Left  | -5  | 20  | 20  | Limbic Lobe   | Anterior Cingulate       | BA 33 | 50 |
| Right | 0   | 20  | 20  | Limbic Lobe   | Anterior Cingulate       | BA 33 | 51 |
| Right | 15  | 0   | -20 | Limbic Lobe   | Parahippocampal Gyrus    | BA 34 | 52 |
| Left  | -15 | 0   | -20 | Limbic Lobe   | Parahippocampal Gyrus    | BA 34 | 53 |
| Left  | -20 | -25 | -20 | Limbic Lobe   | Parahippocampal Gyrus    | BA 35 | 54 |
| Right | 30  | -25 | -25 | Limbic Lobe   | Parahippocampal Gyrus    | BA 35 | 55 |
| Right | 25  | -25 | -20 | Limbic Lobe   | Parahippocampal Gyrus    | BA 35 | 56 |
| Left  | -30 | -30 | -25 | Limbic Lobe   | Parahippocampal Gyrus    | BA 36 | 57 |
| Right | -5  | -40 | 25  | Limbic Lobe   | Posterior Cingulate      | BA 23 | 58 |
| Left  | -45 | -20 | -30 | Temporal Lobe | Fusiform Gyrus           | BA 20 | 59 |
| Left  | -60 | -20 | -15 | Temporal Lobe | Middle Temporal Gyrus    | BA 21 | 60 |
| Right | 60  | -15 | -15 | Temporal Lobe | Middle Temporal Gyrus    | BA 21 | 61 |
| Left  | -45 | -55 | -15 | Temporal Lobe | Fusiform Gyrus           | BA 37 | 62 |
| Right | 45  | -55 | -15 | Temporal Lobe | Fusiform Gyrus           | BA 37 | 63 |
| Left  | -40 | 15  | -30 | Temporal Lobe | Superior Temporal Gyrus  | BA 38 | 64 |
| Right | 40  | 15  | -30 | Temporal Lobe | Superior Temporal Gyrus  | BA 38 | 65 |
| Right | 45  | -65 | 25  | Temporal      | Middle Temporal Gyrus    | BA 39 | 66 |

|       |     |     |    |                |                         |                |  |    |
|-------|-----|-----|----|----------------|-------------------------|----------------|--|----|
|       |     |     |    | Lobe           |                         |                |  |    |
| Left  | -45 | -65 | 25 | Temporal Lobe  | Middle Temporal Gyrus   | BA 39          |  | 67 |
| Left  | -45 | -30 | 10 | Temporal Lobe  | Transverse Gyrus        | Temporal BA 41 |  | 68 |
| Right | 55  | -20 | 5  | Temporal Lobe  | Superior Temporal Gyrus | BA 41          |  | 69 |
| Left  | -55 | -25 | 5  | Temporal Lobe  | Superior Temporal Gyrus | BA 41          |  | 70 |
| Right | 45  | -30 | 10 | Temporal Lobe  | Transverse Gyrus        | Temporal BA 41 |  | 71 |
| Left  | -60 | -10 | 15 | Temporal Lobe  | Transverse Gyrus        | Temporal BA 42 |  | 72 |
| Left  | -60 | -25 | 10 | Temporal Lobe  | Superior Temporal Gyrus | BA 42          |  | 73 |
| Right | 60  | -10 | 15 | Temporal Lobe  | Transverse Gyrus        | Temporal BA 42 |  | 74 |
| Right | 65  | -25 | 10 | Temporal Lobe  | Superior Temporal Gyrus | BA 42          |  | 75 |
| Right | 15  | -85 | 0  | Occipital Lobe | Lingual Gyrus           | BA 17          |  | 76 |
| Right | 10  | -90 | 0  | Occipital Lobe | Lingual Gyrus           | BA 17          |  | 77 |
| Left  | -10 | -90 | 0  | Occipital Lobe | Lingual Gyrus           | BA 17          |  | 78 |
| Left  | -15 | -85 | 0  | Occipital Lobe | Lingual Gyrus           | BA 17          |  | 79 |
| Left  | -25 | -75 | 10 | Occipital Lobe | Cuneus                  | BA 30          |  | 80 |
| Right | 10  | -60 | 5  | Occipital Lobe | Cuneus                  | BA 30          |  | 81 |
| Right | 25  | -75 | 10 | Occipital Lobe | Cuneus                  | BA 30          |  | 82 |
| Right | 40  | -5  | 10 | Sub-lobar      | Insula                  | BA 13          |  | 83 |
| Left  | -40 | -10 | 10 | Sub-lobar      | Insula                  | BA 13          |  | 84 |
